# Supplementary material for: A Real-Time Sensing System for Monitoring Neural Network Degeneration in an Alzheimer’s Disease-on-a-Chip Model
Source: Pharmaceutics. 2022 May 9;14(5):1022. doi: 10.3390/pharmaceutics14051022 (PMC9148060; doi:10.3390/pharmaceutics14051022)
Supplement: Supplementary file 1 [file pharmaceutics-14-01022-s001.zip › pharmaceutics-1695819-supplementary.pdf]

# **A Real-Time Sensing System for Monitoring Neural Network Degeneration in an Alzheimer's Disease-on-a-Chip Model**

Nien-Che Liu <sup>1</sup>, Chu-Chun Liang <sup>1</sup>, Yi-Chen Ethan Li <sup>2</sup> and I-Chi Lee <sup>1, \*</sup>

<sup>1</sup> Department of Biomedical Engineering and Environmental Sciences, National Tsing  
Hua University, Hsinchu, 300044, Taiwan

<sup>2</sup> Department of Chemical Engineering, Feng Chia University, Taichung, 40724,  
Taiwan

**\* Corresponding author: I-Chi Lee**

Mailing address: 300044 No. 101, Section 2, Kuang-Fu Road, Hsinchu, Taiwan,  
R.O.C.

E-mail: [iclee@mx.nthu.edu.tw](mailto:iclee@mx.nthu.edu.tw)

| System<br>Advantages                            | Our brain<br>model | Traditional 2D<br>brain model | Other brain model |                 |
|-------------------------------------------------|--------------------|-------------------------------|-------------------|-----------------|
| Culture system                                  | 2.5D               | 2D                            | 2.5D              | 3D              |
| Biomimetic/dynamic<br>system                    | $\Delta/X$         | $X/\Delta$                    | $\Delta/\Delta$   | $\Delta/\Delta$ |
| Channels connect<br>adjacent spheres            | ✓                  | $X/\Delta$                    | $X/\Delta$        | X               |
| To control and<br>monitor neurite<br>connection | ✓                  | X                             | $X/\Delta$        | X               |
| Real-time monitoring                            | ✓                  | X                             | $X/\checkmark$    | $X/\Delta$      |

**Figure S1.** In comparison of the model developed in this study with the traditional 2D model, and other brain models.

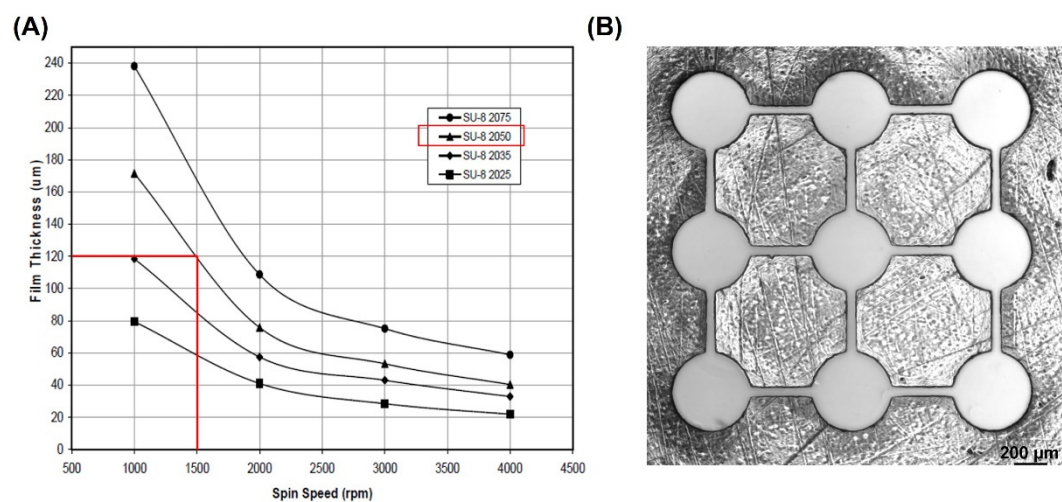

**Figure S2.** (a)The SU8 thickness variation versus spin coating speed increase.  
(b) Image of a 3x3 array.

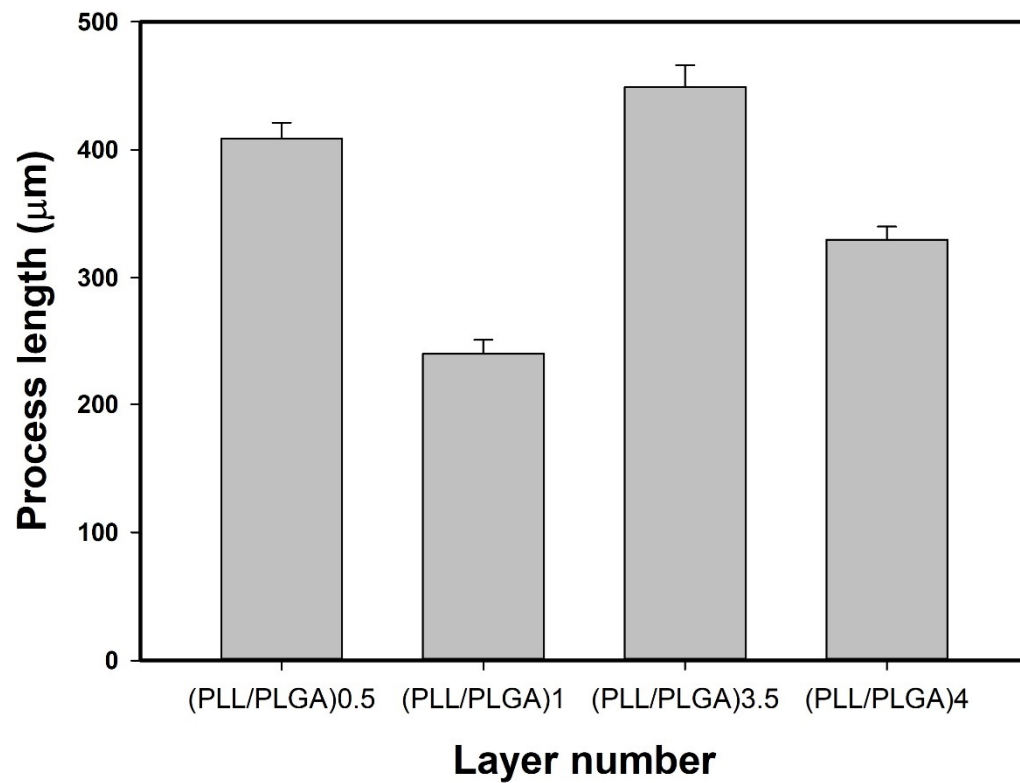

**Figure S3.** Quantification of the lengths of the processes of NSCs on the PLL/PLGA multilayer films under serum-free conditions after 3 days of culture. The lengths of the 10–15 longest processes per neurosphere were estimated linearly from the edge of the neurospheres to the tip of the processes.

(A)

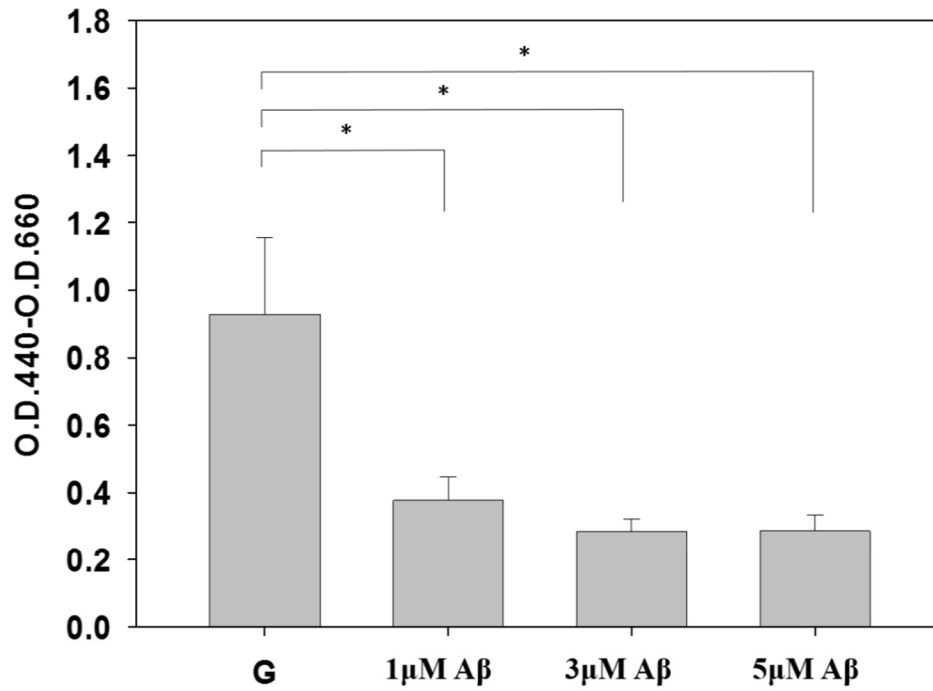

(B)

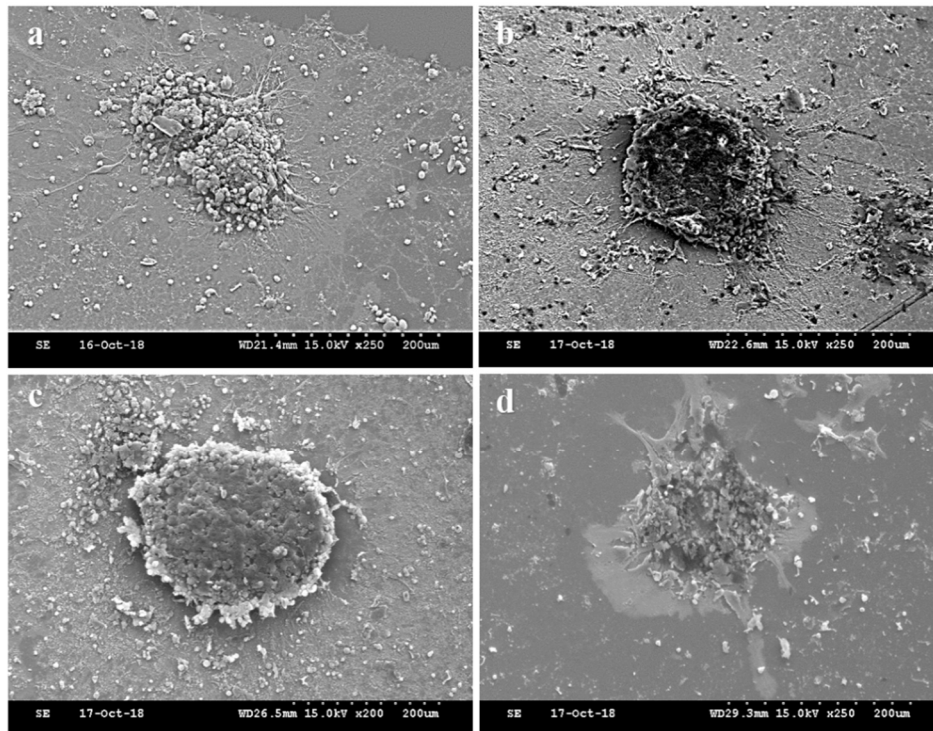

**Figure S4.** (A) Cell viability assay of NSCs incubated with 1  $\mu$ M, 3  $\mu$ M and 5  $\mu$ M of A $\beta$  for 3 days. (B) Morphologies of NSCs incubated with (a) 0, (b) 1  $\mu$ M, (c) 3  $\mu$ M and (d) 5  $\mu$ M of A $\beta$  for 3 days.

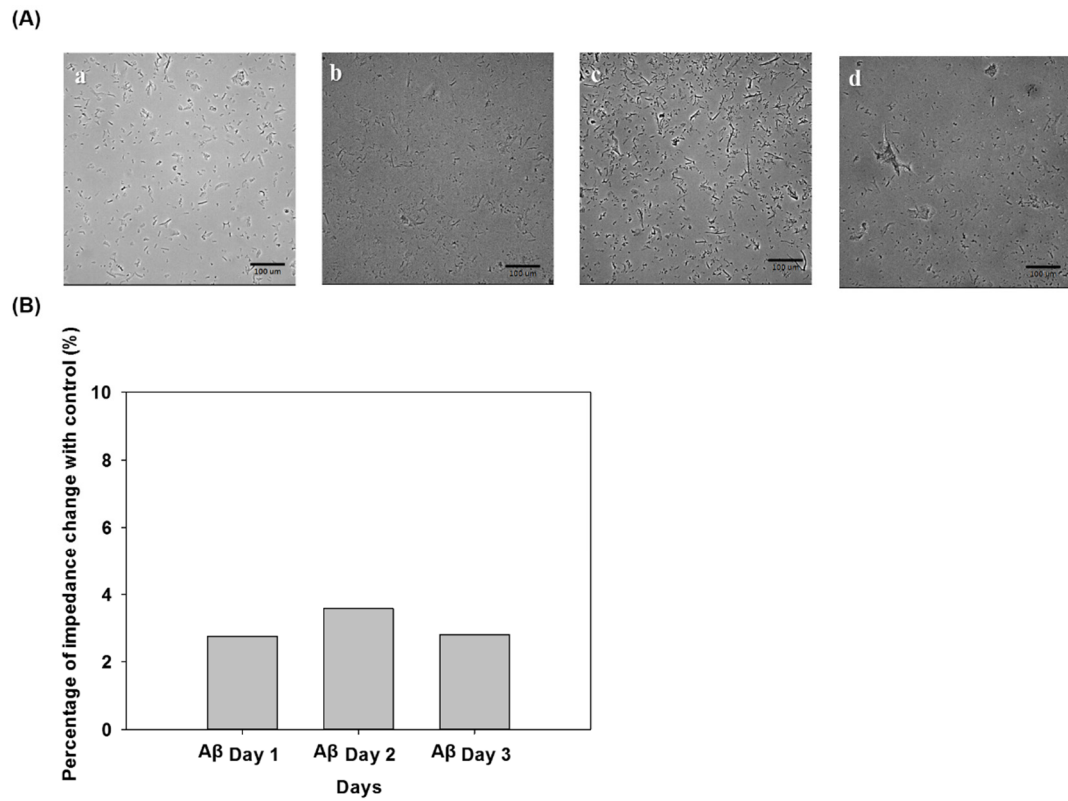

**Figure S5.** (A) The morphology of cells in the system after incubation with A $\beta$  for (a) 1 hr (b) 1 day (c) 2 days and (c) 3 days at 37 °C with 5% CO<sub>2</sub>. (B) The variation in the impedance value in response to incubation with A $\beta$  for 1, 3, and 5 days at 37 °C with 5% CO<sub>2</sub>.

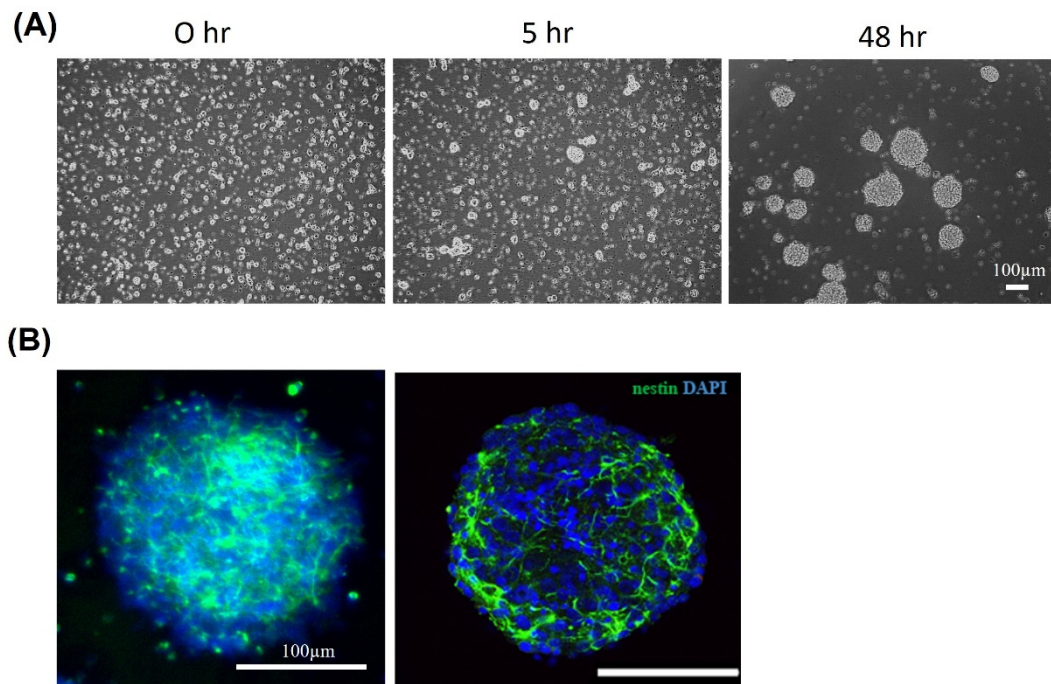

**Figure S6.** The images of NSCs spheroid and the immunostaining of nestin for NSC identification. (A) Phase image (B) Nestin expression.
